# Supplementary material for: The impact of socioeconomic determinants of health and resulting health inequalities on children and young people with long-term health conditions in the UK: a scoping review protocol
Source: Research Square preprint supplement (doi:10.21203/rs.3.rs-4869993/v1), 2025-07-14
Supplement: Supplementary file 2 [file 8d545f70f22629e7aadf5a57.docx]

# **Embase <1974 to 2024 February 08>**

OVID

(Conducted 09/02/24)

1 (Health adj (inequalit* or disadvantage* or equit* or inequit* or equalit* or disparit*)).ab,kf,ot,ti. 52412

2 health disparity/ 37902

3 social status/ or exp income group/ or exp poverty/ or exp social background/ or "social determinants of health"/ or social class/ or household income/ or family income/ or lowest income group/ or highest income group/ or income group/ or working poor/ or wealth inequality/ or economic inequality/ 281232

4 health education/ or exp health literacy/ or exp health promotion/ or educational status/ or exp computer literacy/ or exp health literacy/ or exp information literacy/ or literacy/ or exp media literacy/ or exp numeracy/ or intellectual impairment/ or exp mental deficiency/ 537274

5 race/ or "ethnic or racial aspects"/ or race difference/ or racism/ or social discrimination/ or structural racism/ 183735

6 same-sex marriage/ or single parent/ or "single (marital status)"/ or single-parent family/ or adolescent parent/ or adolescent father/ or adolescent mother/ 10210

7 rural health care/ or urban rural difference/ or medical geography/ or urban health/ 24809

8 gender inequality/ 2061

9 digital divide/ or access to information/ or communication barrier/ 28105

10 ((famil* or parent* or mothe* or fathe* or carer* or caregiver* or care giver*) adj3 (income* or economic* or wealth* or race* or racial* or marital stat* or single* or mental health* or health* or illness* or diseas* or condition* or psychiatr* or psycholog* or disabl* or disabilit* or educat* or school* or nation* or languag*)).ab,kf,ot,ti. 253072

11 (urban* or rural*).ab,kf,ot,ti. 420841

12 ethnic difference/ or ethnic group/ or cultural factor/ or ethnic difference/ or ethnicity/ 293554

13 english as a second language/ or language ability/ or exp english proficiency/ 16442

14 1 or 2 or 3 or 4 or 5 or 6 or 7 or 8 or 9 or 10 or 11 or 12 or 13 1748869

15 (child* or Adolescent* or young person or young people or youth* or infant* or toddler* or pre-school or preschool or paediatric* or pediatric* or baby or babies or neonat* or neo nat* or teen*).ab,kf,ot,ti. 3400400

16 CYP.ab,kf,ot,ti. 25027

17 child/ or disabled child/ or hospitalized child/ or exp infant/ or preschool child/ or school child/ or toddler/ 3143771

18 adolescent/ or hospitalized adolescent/ 1816606

19 pediatrics/ or exp neonatology/ 102381

20 15 or 16 or 17 or 18 or 19 5014732

21 ((long term or chronic) adj3 (condition* or illness* or disorder* or disease*)).ab,kf,ot,ti. 711561

22 chronic disease/ or multiple chronic conditions/ 215154

23 long term care/ 149664

24 21 or 22 or 23 968620

25 14 and 20 and 24 22144

26 ((access* or interfac* or seek* or obtain*) adj2 (health* or doctor* or nurs* or professional* or medic* or physiotherap* or occupational or "speech-and-language*" or emergenc* or paediatric* or pediatric*)).ab,kf,ot,ti. 129869

27 health care access/ or health care delivery/ or health care system/ or mental health care access/ or primary care access/ or right to health/ 410159

28 (diagnos* adj2 (journ* or process* or test* or imag* or scan* or procedur*)).ab,kf,ot,ti. 245695

29 ((communicat* or Inform* or discuss* or break* or explain* or explanation*) adj5 (diagnos* or condition* or illness* or disorder* or disease*)).ab,kf,ot,ti. 308120

30 diagnosis/ or diagnostic procedure/ or exp cytodiagnosis/ or delayed diagnosis/ or diagnostic accuracy/ or exp diagnostic error/ or exp diagnostic test/ or differential diagnosis/ or exp dual diagnosis/ or early diagnosis/ or exp electrodiagnosis/ or exp laboratory diagnosis/ or molecular diagnosis/ or exp physical examination/ or exp prenatal diagnosis/ or prodromal symptom/ or exp psychiatric diagnosis/ or exp radiodiagnosis/ or exp serodiagnosis/ or symptom assessment/ or telediagnosis/ or exp tumor diagnosis/ 7317486

31 (treat* or manag* or therap* or drug* or medicin* or chemo* or cytotoxic* or radiotherap* or surger* or surgical manag*).ab,kf,ot,ti. 15917823

32 ((transition* or transfer* or progress* or shift*) adj3 adult*).ab,kf,ot,ti. 15923

33 therapy/ or exp cancer therapy/ or exp conservative treatment/ or exp counseling/ or exp drug therapy/ or early intervention/ or exp experimental therapy/ or exp maintenance therapy/ or exp patient care/ or exp physical medicine/ or exp prophylaxis/ or exp radiotherapy/ or exp rehabilitation/ or retreatment/ or exp supplementation/ or teletherapy/ or exp therapeutic error/ or therapy delay/ or exp therapy escalation/ or time to treatment/ or treatment duration/ or treatment response/ or treatment switching/ 8598162

34 transition to adult care/ 3084

35 disease management/ or exp managed care/ or exp treatment outcome/ 2420076

36 patient attendance/ 2102

37 patient compliance/ or medication compliance/ 191158

38 (hospital* or hospice* or ((primary or secondary or tertiary or quaternary or mental or psychiatric) adj (care* or health care* or healthcare*)) or NHS or national health service* or school* or college* or community).ab,kf,ot,ti. 4138306

39 primary health care/ or primary medical care/ 214716

40 general practice/ 86366

41 community care/ or exp community health nursing/ or exp community mental health service/ 85280

42 hospice care/ 13893

43 hospital care/ 28079

44 secondary health care/ or secondary care center/ 12596

45 tertiary health care/ or exp tertiary care center/ 165717

46 mental health care/ or exp mental health service/ or exp mental hospital/ or exp psychiatric nursing/ or psychosocial care/ 154098

47 (hous* or home* or social support* or financial aid* or government aid* or equipment*).ab,kf,ot,ti. 1405001

48 housing adequacy/ or exp housing quality/ 1548

49 social care/ or exp social support/ 134101

50 (guid* or polic* or legislat*).ab,kf,ot,ti. 2107091

51 health care policy/ or public policy/ or health care planning/ or legislation/ 416414

52 50 or 51 2372463

53 (educational access* or (school adj (exclusion* or access* or attendance*)) or missed school*).ab,kf,ot,ti. 3676

54 exp return to school/ or exp school attendance/ 3976

55 26 or 27 or 28 or 29 or 30 or 31 or 32 or 33 or 34 or 35 or 36 or 37 22738988

56 38 or 39 or 40 or 41 or 42 or 43 or 44 or 45 or 46 4405269

57 47 or 48 or 49 1476301

58 53 or 54 6677

59 52 or 55 or 56 or 57 or 58 24960996

60 25 and 59 19208

61 limit 60 to (english language and yr="2010 -Current") 14398

# **Ovid Emcare <1995 to 2024 Week 05>**

(Conducted 09/02/24)

1 (Health adj (inequalit* or disadvantage* or equit* or inequit* or equalit* or disparit*)).ab,kf,ot,ti. 32851

2 health disparity/ 12241

3 social status/ or exp income group/ or exp poverty/ or exp social background/ or "social determinants of health"/ or social class/ or household income/ or family income/ or income group/ or highest income group/ or exp lowest income group/ or middle income group/ or working poor/ or wealth inequality/ or economic inequality/ 99637

4 health education/ or exp health literacy/ or exp health promotion/ or educational status/ or exp computer literacy/ or exp health literacy/ or exp information literacy/ or literacy/ or exp media literacy/ or exp numeracy/ or intellectual impairment/ or exp mental deficiency/ 144184

5 race/ or "ethnic or racial aspects"/ or race difference/ or racism/ or social discrimination/ or structural racism/ 43669

6 same-sex marriage/ or single parent/ or "single (marital status)"/ or single-parent family/ or adolescent parent/ or adolescent father/ or adolescent mother/ 5338

7 rural health care/ or urban rural difference/ or medical geography/ or urban health/ 6696

8 gender inequality/ 322

9 digital divide/ or access to information/ or communication barrier/ 8415

10 ((famil* or parent* or mothe* or fathe* or carer* or caregiver* or care giver*) adj3 (income* or economic* or wealth* or race* or racial* or marital stat* or single* or mental health* or health* or illness* or diseas* or condition* or psychiatr* or psycholog* or disabl* or disabilit* or educat* or school* or nation* or languag*)).ab,kf,ot,ti. 118236

11 (urban* or rural*).ab,kf,ot,ti. 154378

12 ethnic difference/ or ethnic group/ or cultural factor/ or ethnic difference/ or ethnicity/ 81559

13 english as a second language/ or language ability/ or exp english proficiency/ 6951

14 1 or 2 or 3 or 4 or 5 or 6 or 7 or 8 or 9 or 10 or 11 or 12 or 13 573237

15 (child* or Adolescent* or young person or young people or youth* or infant* or toddler* or pre-school or preschool or paediatric* or pediatric* or baby or babies or neonat* or neo nat* or teen*).ab,kf,ot,ti. 1086007

16 CYP.ab,kf,ot,ti. 2219

17 child/ or "child of impaired parents"/ or handicapped child/ or hospitalized child/ or exp infant/ or preschool child/ or school child/ or single parent child/ or toddler/ 614725

18 adolescent/ or hospitalized adolescent/ 313570

19 pediatrics/ or exp neonatology/ 25553

20 15 or 16 or 17 or 18 or 19 1261078

21 ((long term or chronic) adj3 (condition* or illness* or disorder* or disease*)).ab,kf,ot,ti. 173493

22 chronic disease/ or multiple chronic conditions/ 53351

23 long term care/ 37832

24 21 or 22 or 23 225065

25 14 and 20 and 24 6722

26 ((access* or interfac* or seek* or obtain*) adj2 (health* or doctor* or nurs* or professional* or medic* or physiotherap* or occupational or "speech-and-language*" or emergenc* or paediatric* or pediatric*)).ab,kf,ot,ti. 58833

27 health care access/ or health care delivery/ or health care system/ or right to health/ 125142

28 (diagnos* adj2 (journ* or process* or test* or imag* or scan* or procedur*)).ab,kf,ot,ti. 58581

29 ((communicat* or Inform* or discuss* or break* or explain* or explanation*) adj5 (diagnos* or condition* or illness* or disorder* or disease*)).ab,kf,ot,ti. 77443

30 diagnosis/ or diagnostic procedure/ or exp cytodiagnosis/ or delayed diagnosis/ or diagnostic accuracy/ or exp diagnostic error/ or exp diagnostic test/ or differential diagnosis/ or exp dual diagnosis/ or early diagnosis/ or exp electrodiagnosis/ or exp laboratory diagnosis/ or molecular diagnosis/ or exp physical examination/ or exp prenatal diagnosis/ or prodromal symptom/ or exp psychiatric diagnosis/ or exp radiodiagnosis/ or exp serodiagnosis/ or symptom assessment/ or telediagnosis/ or exp tumor diagnosis/ 1105215

31 (treat* or manag* or therap* or drug* or medicin* or chemo* or cytotoxic* or radiotherap* or surger* or surgical manag*).ab,kf,ot,ti. 3320328

32 ((transition* or transfer* or progress* or shift*) adj3 adult*).ab,kf,ot,ti. 5727

33 therapy/ or exp cancer therapy/ or exp conservative treatment/ or exp counseling/ or exp drug therapy/ or early intervention/ or exp experimental therapy/ or exp maintenance therapy/ or exp patient care/ or exp physical medicine/ or exp prophylaxis/ or exp radiotherapy/ or exp rehabilitation/ or retreatment/ or exp supplementation/ or teletherapy/ or exp therapeutic error/ or therapy delay/ or exp therapy escalation/ or time to treatment/ or treatment duration/ or treatment response/ or treatment switching/ 1485636

34 transition to adult care/ 466

35 disease management/ or exp managed care/ or exp treatment outcome/ 444330

36 patient attendance/ 254

37 patient compliance/ or medication compliance/ 41578

38 (hospital* or hospice* or ((primary or secondary or tertiary or quaternary or mental or psychiatric) adj (care* or health care* or healthcare*)) or NHS or national health service* or school* or college* or community).ab,kf,ot,ti. 1368849

39 primary health care/ or primary medical care/ 88465

40 general practice/ 28606

41 community care/ or exp community health nursing/ or exp community mental health service/ 25603

42 hospice care/ 4361

43 hospital care/ 11302

44 secondary health care/ or secondary care center/ 2771

45 tertiary health care/ or tertiary care center/ 25020

46 mental health care/ or exp mental health service/ or exp mental hospital/ or exp psychiatric nursing/ or psychosocial care/ 53749

47 (hous* or home* or social support* or financial aid* or government aid* or equipment*).ab,kf,ot,ti. 425613

48 housing quality/ 78

49 social care/ or exp social support/ 57285

50 (guid* or polic* or legislat*).ab,kf,ot,ti. 716985

51 health care planning/ or health care policy/ or public policy/ or health legislation/ 103361

52 50 or 51 772880

53 (educational access* or (school adj (exclusion* or access* or attendance*)) or missed school*).ab,kf,ot,ti. 1723

54 return to school/ or school attendance/ 668

55 26 or 27 or 28 or 29 or 30 or 31 or 32 or 33 or 34 or 35 or 36 or 37 4583377

56 38 or 39 or 40 or 41 or 42 or 43 or 44 or 45 or 46 1445094

57 47 or 48 or 49 445542

58 53 or 54 2075

59 52 or 55 or 56 or 57 or 58 5458781

60 25 and 59 5780

61 limit 60 to (english language and yr="2010 -Current") 3936

# **Ovid MEDLINE(R) ALL <1946 to February 20, 2024>**

(Conducted 20/02/24)

1 (Health adj (inequalit* or disadvantage* or equit* or inequit* or equalit* or disparit*)).ab,kf,ot,ti. 44981

2 health inequities/ or health status disparities/ or Healthcare Disparities/ 40046

3 exp Social Status/ or socioeconomic disparities in health/ or social deprivation/ or cultural deprivation/ or social vulnerability/ or sociodemographic factors/ or socioeconomic factors/ or economic factors/ or economic stability/ or housing instability/ or economic status/ or exp poverty/ or child poverty/ or social class/ or low socioeconomic status/ or "Social Determinants of Health"/ or exp income/ or working poor/ 312882

4 health education/ or health literacy/ or health promotion/ or patient education as topic/ or educational status/ or literacy/ or computer literacy/ or exp information literacy/ or exp Intellectual Disability/ 397210

5 exp ethnicity/ or exp racial groups/ or "Ethnic and Racial Minorities"/ or Minority Groups/ or racism/ or systemic racism/ or exp Social Discrimination/ 214153

6 exp marital status/ or single person/ or single parent/ or Single-Parent Family/ or adolescent fathers/ or Adolescent Mothers/ 41010

7 rural health/ or suburban health/ or urban health/ or rural health services/ or urban health services/ or Geography, Medical/ 56287

8 Gender Equity/ 674

9 access to information/ or communication barriers/ or digital divide/ 14619

10 ((famil* or parent* or mothe* or fathe* or carer* or caregiver* or care giver*) adj3 (income* or economic* or wealth* or race* or racial* or marital stat* or single* or mental health* or health* or illness* or diseas* or condition* or psychiatr* or psycholog* or disabl* or disabilit* or educat* or school* or nation* or languag*)).ab,kf,ot,ti. 196278

11 (urban* or rural*).ab,kf,ot,ti. 343243

12 cultural characteristics/ or exp cultural diversity/ 29666

13 limited english proficiency/ or multilingualism/ 6346

14 1 or 2 or 3 or 4 or 5 or 6 or 7 or 8 or 9 or 10 or 11 or 12 or 13 1376562

15 (child* or Adolescent* or young person or young people or youth* or infant* or toddler* or pre-school or preschool or paediatric* or pediatric* or baby or babies or neonat* or neo nat* or teen*).ab,kf,ot,ti. 2724472

16 CYP.ab,kf,ot,ti. 18284

17 exp child/ or child, preschool/ or exp infant/ or child, foster/ or disabled children/ or child, hospitalized/ 2826791

18 adolescent/ or adolescent, hospitalized/ 2236524

19 pediatrics/ or neonatology/ or perinatology/ or birth cohort/ or exp infant, newborn/ 736775

20 15 or 16 or 17 or 18 or 19 4817079

21 ((long term or chronic) adj3 (condition* or illness* or disorder* or disease*)).ab,kf,ot,ti. 482801

22 exp chronic disease/ or multiple chronic conditions/ 633227

23 Long-Term Care/ 28828

24 21 or 22 or 23 987363

25 14 and 20 and 24 19198

26 ((access* or interfac* or seek* or obtain*) adj2 (health* or doctor* or nurs* or professional* or medic* or physiotherap* or occupational or "speech-and-language*" or emergenc* or paediatric* or pediatric*)).ab,kf,ot,ti. 95972

27 health services accessibility/ or access to primary care/ or right to health/ or exp "delivery of health care"/ 1245210

28 (diagnos* adj2 (journ* or process* or test* or imag* or scan* or procedur*)).ab,kf,ot,ti. 169659

29 ((communicat* or Inform* or discuss* or break* or explain* or explanation*) adj5 (diagnos* or condition* or illness* or disorder* or disease*)).ab,kf,ot,ti. 218683

30 diagnosis/ or delayed diagnosis/ or diagnosis, differential/ or "diagnosis, dual (psychiatry)"/ or diagnostic errors/ or "diagnostic techniques and procedures"/ or exp diagnostic imaging/ or electrodiagnosis/ or medical history taking/ or physical examination/ or symptom assessment/ or early diagnosis/ or cytodiagnosis/ or exp Prenatal Diagnosis/ or prodromal symptoms/ or telemedicine/ or remote consultation/ 3478485

31 (treat* or manag* or therap* or drug* or medicin* or chemo* or cytotoxic* or radiotherap* or surger* or surgical manag*).ab,kf,ot,ti. 12082726

32 ((transition* or transfer* or progress* or shift*) adj3 adult*).ab,kf,ot,ti. 10830

33 therapeutics/ or conservative treatment/ or drug therapy/ or exp chemotherapy, adjuvant/ or exp medication errors/ or time-to-treatment/ or withholding treatment/ or radiotherapy/ or exp rehabilitation/ or remission induction/ or induction chemotherapy/ or retreatment/ or treatment switching/ or exp Counseling/ or Therapies, Investigational/ or exp patient care/ or delayed diagnosis/ or physical therapy modalities/ or exercise therapy/ or precision medicine/ or exp telemedicine/ or telerehabilitation/ or "duration of therapy"/ or treatment switching/ or exp Psychotherapy/ or psychiatric rehabilitation/ 1750519

34 Transition to Adult Care/ 2214

35 disease management/ or treatment outcome/ or treatment failure/ 1246602

36 No-Show Patients/ 249

37 patient compliance/ or medication adherence/ 84893

38 (hospital* or hospice* or ((primary or secondary or tertiary or quaternary or mental or psychiatric) adj (care* or health care* or healthcare*)) or NHS or national health service* or school* or college* or community).ab,kf,ot,ti. 2880420

39 Primary Health Care/ 93331

40 general practice/ or family practice/ 79085

41 community health services/ or community health nursing/ or community mental health services/ or community psychiatry/ 71748

42 Hospice Care/ or hospices/ 13040

43 Hospitals/ 104268

44 secondary care centers/ or secondary care/ 1309

45 tertiary care centers/ or tertiary healthcare/ 24340

46 Mental Health Services/ or Hospitals, Psychiatric/ or Psychiatric Nursing/ 78983

47 (hous* or home* or social support* or financial aid* or government aid* or equipment*).ab,kf,ot,ti. 1074969

48 housing quality/ 74

49 social support/ or social welfare/ or social work/ 103997

50 (guid* or polic* or legislat*).ab,kf,ot,ti. 1537601

51 public policy/ or health policy/ or Health Planning/ or legislation/ 125942

52 50 or 51 1603296

53 (educational access* or (school adj (exclusion* or access* or attendance*)) or missed school*).ab,kf,ot,ti. 2713

54 Return to School/ or Absenteeism/ 9894

55 26 or 27 or 28 or 29 or 30 or 31 or 32 or 33 or 34 or 35 or 36 or 37 16026791

56 38 or 39 or 40 or 41 or 42 or 43 or 44 or 45 or 46 3061535

57 47 or 48 or 49 1143221

58 53 or 54 12259

59 52 or 55 or 56 or 57 or 58 18084245

60 25 and 59 15189

61 limit 60 to (english language and yr="2010") **438**

# **# Web of Science Search Strategy (v0.1)**

(Conducted 04/03/24)

**Search:** "Health" near/0 ("inequalit*" or "disadvantage*" or "equit*" or "inequit*" or "equalit*" or "disparit*")  (Topic) OR ("famil*" or "parent*" or "mothe*" or "fathe*" or "carer*" or "caregiver*" or "care giver*") near/2 ("income*" or "economic*" or "wealth*" or "race*" or "racial*" or "marital stat*" or "single*" or "mental health*" or "health*" or "illness*" or "diseas*" or "condition*" or "psychiatr*" or "psycholog*" or "disabl*" or "disabilit*" or "educat*" or "school*" or "nation*" or "languag*")  (Topic) OR "urban*" or "rural*"  (Topic)                        Date Run: Mon Mar 04 2024 14:20:45 GMT+0000 (Greenwich Mean Time)       Results: 1340449

**Search:** "child*" or "Adolescent*" or "young person*" or "young people" or "youth*" or "infant*" or "toddler*" or "pre-school" or "preschool" or "paediatric*" or "pediatric*" or "baby" or "babies" or "neonat*" or "neo nat*" or "teen*" or "CYP*"  (Topic)                        Date Run: Mon Mar 04 2024 14:21:19 GMT+0000 (Greenwich Mean Time)       Results: 3908150

**Search:** ("long term" or "chronic") near/2 ("condition*" or "illness*" or "disorder*" or "disease*")  (Topic)                        Date Run: Mon Mar 04 2024 14:21:54 GMT+0000 (Greenwich Mean Time)       Results: 534486

**Search:** ("access*" or "interfac*" or "seek*" or "obtain*") near/1 ("health*" or "doctor*" or "nurs*" or "professional*" or "medic*" or "physiotherap*" or "occupational" or "speech-and-language*" or "emergenc*" or "paediatric*" or "pediatric*")  (Topic) OR "diagnos*" near/1 ("journ*" or "process*" or "test*" or "imag*" or "scan*" or "procedur*")  (Topic) OR ("communicat*" or "Inform*" or "discuss*" or "break*" or "explain*" or "explanation*") near/4 ("diagnos*" or "condition*" or "illness*" or "disorder*" or "disease*")  (Topic) OR "treat*" or "manag*" or "therap*" or "drug*" or "medicin*" or "chemo*" or "cytotoxic*" or "radiotherap*" or "surger*" or "surgical manag*"  (Topic) OR ("transition*" or "transfer*" or "progress*" or "shift*") near/2 "adult*"  (Topic) OR "hospital*" or "hospice*" or (("primary" or "secondary" or "tertiary" or "quaternary" or "mental" or "psychiatric") near/0 ("care*" or "health care*" or "healthcare*")) or "NHS" or "national health service*" or "school*" or "college*" or "community"  (Topic) OR "hous*" or "home*" or "social support*" or "financial aid*" or "government aid*" or "equipment*"  (Topic) OR "guid*" or "polic*" or "legislat*"  (Topic) OR "educational access*" or ("school" near/0 ("exclusion*" or "access*" or "attendance*")) or "missed school*"  (Topic)                        Date Run: Mon Mar 04 2024 14:22:48 GMT+0000 (Greenwich Mean Time)       Results: 22520851

# Database: Web of Science Core Collection

# Entitlements:

- WOS.IC: 1993 to 2024

- WOS.CCR: 1985 to 2024

- WOS.SCI: 1900 to 2024

- WOS.AHCI: 1975 to 2024

- WOS.BHCI: 2005 to 2024

- WOS.BSCI: 2005 to 2024

- WOS.ESCI: 2005 to 2024

- WOS.ISTP: 1990 to 2024

- WOS.SSCI: 1900 to 2024

- WOS.ISSHP: 1990 to 2024

# Searches:

**Search: #1 AND #2 AND #3 AND #4 and English  (Languages)          Timespan: 2010-01-01 to 2024-12-31**        Date Run: Mon Mar 04 2024 14:26:39 GMT+0000 (Greenwich Mean Time)       Results: 4564

# **SCOPUS**

(Conducted 04/03/24)

( TITLE-ABS-KEY ( ( "long term" OR "chronic" ) W/3 ( "condition*" OR "illness*" OR "disorder*" OR "disease*" ) ) ) AND ( TITLE-ABS-KEY ( "child*" OR "Adolescent*" OR "young person*" OR "young people" OR "youth*" OR "infant*" OR "toddler*" OR "pre-school" OR "preschool" OR "paediatric*" OR "pediatric*" OR "baby" OR "babies" OR "neonat*" OR "neo nat*" OR "teen*" OR "CYP*" ) ) AND ( ( TITLE-ABS-KEY ( ( "access*" OR "interfac*" OR "seek*" OR "obtain*" ) W/1 ( "health*" OR "doctor*" OR "nurs*" OR "professional*" OR "medic*" OR "physiotherap*" OR "occupational" OR "speech-and-language*" OR "emergenc*" OR "paediatric*" OR "pediatric*" ) ) OR TITLE-ABS-KEY ( "diagnos*" W/1 ( "journ*" OR "process*" OR "test*" OR "imag*" OR "scan*" OR "procedur*" ) ) OR TITLE-ABS-KEY ( ( "communicat*" OR "Inform*" OR "discuss*" OR "break*" OR "explain*" OR "explanation*" ) W/4 ( "diagnos*" OR "condition*" OR "illness*" OR "disorder*" OR "disease*" ) ) OR TITLE-ABS-KEY ( "treat*" OR "manag*" OR "therap*" OR "drug*" OR "medicin*" OR "chemo*" OR "cytotoxic*" OR "radiotherap*" OR "surger*" OR "surgical manag*" ) OR TITLE-ABS-KEY ( ( "transition*" OR "transfer*" OR "progress*" OR "shift*" ) W/2 "adult*" ) OR TITLE-ABS-KEY ( "hospital*" OR "hospice*" OR ( ( "primary" OR "secondary" OR "tertiary" OR "quaternary" OR "mental" OR "psychiatric" ) W/0 ( "care*" OR "health care*" OR "healthcare*" ) ) OR "NHS" OR "national health service*" OR "school*" OR "college*" OR "community" ) OR TITLE-ABS-KEY ( "hous*" OR "home*" OR "social support*" OR "financial aid*" OR "government aid*" OR "equipment*" ) OR TITLE-ABS-KEY ( "guid*" OR "polic*" OR "legislat*" ) OR TITLE-ABS-KEY ( "educational access*" OR ( "school" near/0 ( "exclusion*" OR "access*" OR "attendance*" ) ) OR "missed school*" ) ) ) AND ( ( TITLE-ABS-KEY ( "Health" W/0 ( "inequalit*" OR "disadvantage*" OR "equit*" OR "inequit*" OR "equalit*" OR "disparit*" ) ) OR TITLE-ABS-KEY ( ( "famil*" OR "parent*" OR "mothe*" OR "fathe*" OR "carer*" OR "caregiver*" OR "care giver*" ) W/2 ( "income*" OR "economic*" OR "wealth*" OR "race*" OR "racial*" OR "marital stat*" OR "single*" OR "mental health*" OR "health*" OR "illness*" OR "diseas*" OR "condition*" OR "psychiatr*" OR "psycholog*" OR "disabl*" OR "disabilit*" OR "educat*" OR "school*" OR "nation*" OR "languag*" ) ) OR TITLE-ABS-KEY ( "urban*" OR "rural*" ) ) ) AND PUBYEAR > 2009 AND PUBYEAR < 2025 AND ( LIMIT-TO ( LANGUAGE , "English" ) )

# **COCHRANE LIBRARY**

(Conducted 04/03/24)

Search Name: Cochrane HI search 4/3/24 - Completed

Date Run: 04/03/2024 20:58:09

Comment:

ID Search Hits

#1 Health NEXT (inequalit* or disadvantage* or equit* or inequit* or equalit* or disparit*) 2616

#2 MeSH descriptor: [Health Inequities] explode all trees 584

#3 MeSH descriptor: [Social Status] this term only 11

#4 MeSH descriptor: [Poverty] explode all trees 2433

#5 MeSH descriptor: [Social Group] explode all trees 4

#6 MeSH descriptor: [Social Determinants of Health] this term only 79

#7 MeSH descriptor: [Social Class] explode all trees 892

#8 MeSH descriptor: [Socioeconomic Factors] explode all trees 14305

#9 MeSH descriptor: [Income] this term only 519

#10 MeSH descriptor: [Working Poor] this term only 0

#11 MeSH descriptor: [Health Educators] explode all trees 34

#12 MeSH descriptor: [Health Literacy] this term only 682

#13 MeSH descriptor: [Health Promotion] this term only 7836

#14 MeSH descriptor: [Educational Status] explode all trees 2314

#15 MeSH descriptor: [Computer Literacy] this term only 54

#16 MeSH descriptor: [Literacy] this term only 135

#17 MeSH descriptor: [Information Literacy] explode all trees 700

#18 MeSH descriptor: [Intellectual Disability] explode all trees 2008

#19 MeSH descriptor: [Child of Impaired Parents] explode all trees 215

#20 MeSH descriptor: [Racial Groups] explode all trees 4377

#21 MeSH descriptor: [Ethnic and Racial Minorities] explode all trees 26

#22 MeSH descriptor: [Race Factors] explode all trees 46

#23 MeSH descriptor: [Racism] explode all trees 90

#24 MeSH descriptor: [Systemic Racism] this term only 1

#25 MeSH descriptor: [Social Discrimination] explode all trees 226

#26 MeSH descriptor: [Marriage] this term only 369

#27 MeSH descriptor: [Single Parent] this term only 45

#28 MeSH descriptor: [Marital Status] this term only 234

#29 MeSH descriptor: [Single-Parent Family] this term only 13

#30 MeSH descriptor: [Adolescent Fathers] this term only 0

#31 MeSH descriptor: [Adolescent Mothers] this term only 9

#32 MeSH descriptor: [Rural Health Services] this term only 454

#33 MeSH descriptor: [Urban Health Services] this term only 172

#34 MeSH descriptor: [Geography, Medical] this term only 5

#35 MeSH descriptor: [Gender Equity] this term only 6

#36 MeSH descriptor: [Digital Divide] this term only 5

#37 MeSH descriptor: [Access to Information] this term only 80

#38 MeSH descriptor: [Internet Access] this term only 6

#39 MeSH descriptor: [Communication Barriers] this term only 137

#40 (famil* or parent* or mothe* or fathe* or carer* or caregiver* or (care NEXT giver*)) NEAR/2 (income* or economic* or wealth* or race* or racial* or (marital NEXT stat*) or single* or (mental NEXT health*) or health* or illness* or diseas* or condition* or psychiatr* or psycholog* or disabl* or disabilit* or educat* or school* or nation* or languag*) 23764

#41 urban* or rural* 25089

#42 MeSH descriptor: [Ethnicity] explode all trees 3409

#43 MeSH descriptor: [Cultural Characteristics] explode all trees 219

#44 MeSH descriptor: [Sociodemographic Factors] explode all trees 13

#45 MeSH descriptor: [Culture] this term only 615

#46 MeSH descriptor: [Cultural Diversity] explode all trees 110

#47 MeSH descriptor: [Limited English Proficiency] this term only 8

#48 #1 OR #2 OR #3 OR #4 OR #5 OR #6 OR #7 OR #8 OR #9 OR #10 OR #11 OR #12 OR #13 OR #14 OR #15 OR #16 OR #17 OR #18 OR #19 OR #20 OR #21 OR #22 OR #23 OR #24 OR #25 OR #26 OR #27 OR #28 OR #29 OR #30 OR #31 OR #32 OR #33 OR #34 OR #35 OR #36 OR #37 OR #38 OR #39 OR #40 OR #41 OR #42 OR #43 OR #44 OR #45 OR #46 OR #47 72260

#49 child* or Adolescent* or (young NEXT person*) or "young people" or youth* or infant* or toddler* or pre-school or preschool or paediatric* or pediatric* or baby or babies or neonat* or neo nat* or teen* or CYP 386505

#50 MeSH descriptor: [Child] explode all trees 81477

#51 MeSH descriptor: [Disabled Children] this term only 165

#52 MeSH descriptor: [Child, Hospitalized] this term only 196

#53 MeSH descriptor: [Infant] explode all trees 45884

#54 MeSH descriptor: [Child, Preschool] this term only 39373

#55 MeSH descriptor: [Adolescent] this term only 136503

#56 MeSH descriptor: [Adolescent, Hospitalized] this term only 10

#57 MeSH descriptor: [Pediatrics] explode all trees 1043

#58 MeSH descriptor: [Infant, Newborn] explode all trees 23918

#59 MeSH descriptor: [Neonatology] this term only 60

#60 #49 OR #50 OR #51 OR #52 OR #53 OR #54 OR #55 OR #56 OR #57 OR #58 OR #59 386520

#61 ("long term" or chronic) NEAR/2 (condition* or illness* or disorder* or disease*) 72413

#62 MeSH descriptor: [Chronic Disease] explode all trees 43159

#63 MeSH descriptor: [Multiple Chronic Conditions] this term only 81

#64 MeSH descriptor: [Long-Term Care] this term only 1522

#65 #61 OR #62 OR #63 OR #64 88413

#66 #48 AND #60 AND #65 1695

#67 (access* or interfac* or seek* or obtain*) NEAR/1 (health* or doctor* or nurs* or professional* or medic* or physiotherap* or occupational or "speech and language" or emergenc* or paediatric* or pediatric*) 4328

#68 MeSH descriptor: [Health Services Accessibility] this term only 1109

#69 MeSH descriptor: [Delivery of Health Care] explode all trees 67196

#70 MeSH descriptor: [Access to Primary Care] this term only 0

#71 MeSH descriptor: [Right to Health] this term only 0

#72 diagnos* NEAR/1 (journ* or process* or test* or imag* or scan* or procedur*) 55992

#73 (communicat* or Inform* or discuss* or break* or explain* or explanation*) NEAR/4 (diagnos* or condition* or illness* or disorder* or disease*) 14960

#74 MeSH descriptor: [Diagnosis] this term only 80

#75 MeSH descriptor: [Diagnostic Techniques and Procedures] this term only 55

#76 MeSH descriptor: [Diagnostic Tests, Routine] this term only 381

#77 MeSH descriptor: [Cytodiagnosis] this term only 130

#78 MeSH descriptor: [Delayed Diagnosis] this term only 62

#79 MeSH descriptor: [Diagnostic Errors] this term only 393

#80 MeSH descriptor: [Diagnosis, Differential] this term only 1913

#81 MeSH descriptor: [Diagnosis, Dual (Psychiatry)] this term only 379

#82 MeSH descriptor: [Early Diagnosis] this term only 787

#83 MeSH descriptor: [Electrodiagnosis] this term only 147

#84 MeSH descriptor: [Clinical Laboratory Techniques] this term only 188

#85 MeSH descriptor: [Molecular Diagnostic Techniques] explode all trees 168

#86 MeSH descriptor: [Physical Examination] this term only 1117

#87 MeSH descriptor: [Prenatal Diagnosis] explode all trees 1249

#88 MeSH descriptor: [Prodromal Symptoms] this term only 97

#89 MeSH descriptor: [Mental Disorders] this term only 5396

#90 MeSH descriptor: [Missed Diagnosis] this term only 15

#91 MeSH descriptor: [Diagnostic Imaging] this term only 249

#92 MeSH descriptor: [Serologic Tests] this term only 271

#93 MeSH descriptor: [Symptom Assessment] this term only 450

#94 MeSH descriptor: [Remote Consultation] this term only 449

#95 treat* or manag* or therap* or drug* or medicin* or chemo* or cytotoxic* or radiotherap* or surger* or (surgical NEXT manag*) 1663148

#96 (transition* or transfer* or progress* or shift*) NEAR/2 adult* 656

#97 MeSH descriptor: [Therapeutics] this term only 147

#98 MeSH descriptor: [Conservative Treatment] this term only 346

#99 MeSH descriptor: [Counseling] explode all trees 7521

#100 MeSH descriptor: [Drug Therapy] this term only 488

#101 MeSH descriptor: [Early Medical Intervention] this term only 561

#102 MeSH descriptor: [Therapies, Investigational] this term only 45

#103 MeSH descriptor: [Maintenance Chemotherapy] this term only 614

#104 MeSH descriptor: [Induction Chemotherapy] this term only 684

#105 MeSH descriptor: [Patient Care] explode all trees 93759

#106 MeSH descriptor: [Physical and Rehabilitation Medicine] this term only 35

#107 MeSH descriptor: [Antibiotic Prophylaxis] this term only 1763

#108 MeSH descriptor: [Radiotherapy] this term only 1571

#109 MeSH descriptor: [Rehabilitation] explode all trees 54123

#110 MeSH descriptor: [Retreatment] this term only 1172

#111 MeSH descriptor: [Dietary Supplements] this term only 16376

#112 MeSH descriptor: [Mental Health Teletherapy] explode all trees 0

#113 MeSH descriptor: [Telerehabilitation] explode all trees 333

#114 MeSH descriptor: [Medication Errors] explode all trees 730

#115 MeSH descriptor: [Treatment Delay] this term only 0

#116 MeSH descriptor: [Time-to-Treatment] this term only 682

#117 MeSH descriptor: [Duration of Therapy] this term only 89

#118 MeSH descriptor: [Treatment Outcome] this term only 190552

#119 MeSH descriptor: [Treatment Switching] this term only 7

#120 MeSH descriptor: [Transition to Adult Care] this term only 60

#121 MeSH descriptor: [Disease Management] this term only 1449

#122 MeSH descriptor: [Patient Care Management] explode all trees 42389

#123 MeSH descriptor: [No-Show Patients] this term only 18

#124 MeSH descriptor: [Patient Compliance] this term only 11799

#125 MeSH descriptor: [Medication Adherence] this term only 3615

#126 hospital* or hospice* or ((primary or secondary or tertiary or quaternary or mental or psychiatric) NEAR/0 (care* or (health NEXT care*) or healthcare*)) or NHS or "national health service" or school* or college* or community 653454

#127 MeSH descriptor: [Primary Health Care] this term only 6499

#128 MeSH descriptor: [General Practice] this term only 795

#129 MeSH descriptor: [Family Practice] this term only 2373

#130 MeSH descriptor: [Primary Care Nursing] this term only 45

#131 MeSH descriptor: [Community Mental Health Services] this term only 907

#132 MeSH descriptor: [Hospice Care] this term only 176

#133 MeSH descriptor: [Home Care Services, Hospital-Based] this term only 286

#134 MeSH descriptor: [Secondary Care] this term only 76

#135 MeSH descriptor: [Secondary Care Centers] this term only 9

#136 MeSH descriptor: [Tertiary Healthcare] this term only 45

#137 MeSH descriptor: [Tertiary Care Centers] this term only 611

#138 MeSH descriptor: [Mental Health Services] explode all trees 9439

#139 MeSH descriptor: [Hospitals, Psychiatric] this term only 304

#140 MeSH descriptor: [Psychiatric Nursing] this term only 251

#141 MeSH descriptor: [Psychiatric Rehabilitation] this term only 84

#142 hous* or home* or (social NEXT support*) or (financial NEXT aid*) or (government NEXT aid*) or equipment* 130516

#143 MeSH descriptor: [Housing Quality] this term only 1

#144 MeSH descriptor: [Home Environment] this term only 17

#145 MeSH descriptor: [Social Support] explode all trees 4343

#146 guid* or polic* or legislat* 149827

#147 MeSH descriptor: [Health Policy] this term only 392

#148 MeSH descriptor: [Health Policy] this term only 392

#149 MeSH descriptor: [Health Planning Guidelines] this term only 34

#150 MeSH descriptor: [Health Planning] this term only 56

#151 MeSH descriptor: [Legislation, Hospital] this term only 3

#152 MeSH descriptor: [Legislation, Medical] this term only 6

#153 MeSH descriptor: [Legislation, Nursing] explode all trees 0

#154 (educational NEXT access*) or (school NEAR/0 (exclusion* or access* or attendance*)) or (missed NEXT school*) 132

#155 MeSH descriptor: [Return to School] this term only 1

#156 {OR #67-#155} 1793792

#157 #66 AND #156 with Cochrane Library publication date from Jan 2010 to present 1397

# **Sociological Abstracts**

# ProQuest

(Conducted 01/03/2024)

Set#: S1

Searched for: ((abstract(Health NEAR/0 (inequalit* OR disadvantage* OR equit* OR inequit* OR equalit* OR disparit*)) OR title(Health NEAR/0 (inequalit* OR disadvantage* OR equit* OR inequit* OR equalit* OR disparit*)) OR if(Health NEAR/0 (inequalit* OR disadvantage* OR equit* OR inequit* OR equalit* OR disparit*)) OR MAINSUBJECT.EXACT("Health disparities") OR (MAINSUBJECT.EXACT.EXPLODE("Social status") OR MAINSUBJECT.EXACT("Socioeconomic status") OR MAINSUBJECT.EXACT("Social inequality") OR MAINSUBJECT.EXACT("Child poverty") OR MAINSUBJECT.EXACT("Socioeconomic factors") OR MAINSUBJECT.EXACT("Economic factors") OR MAINSUBJECT.EXACT("Social isolation") OR MAINSUBJECT.EXACT.EXPLODE("Poverty") OR MAINSUBJECT.EXACT("Low income groups") OR MAINSUBJECT.EXACT("Sociodemographics") OR MAINSUBJECT.EXACT.EXPLODE("Social classes") OR MAINSUBJECT.EXACT.EXPLODE("Income") OR MAINSUBJECT.EXACT("Low income areas")) OR (MAINSUBJECT.EXACT("Literacy") OR MAINSUBJECT.EXACT.EXPLODE("Intellectual disabilities") OR MAINSUBJECT.EXACT("Health education") OR MAINSUBJECT.EXACT("Illiteracy")) OR (MAINSUBJECT.EXACT.EXPLODE("Ethnic groups") OR MAINSUBJECT.EXACT("Racism") OR MAINSUBJECT.EXACT.EXPLODE("Discrimination") OR MAINSUBJECT.EXACT("Systemic racism") OR MAINSUBJECT.EXACT("Racial inequality") OR MAINSUBJECT.EXACT("Ethnicity") OR MAINSUBJECT.EXACT("Racial discrimination") OR MAINSUBJECT.EXACT("Race") OR MAINSUBJECT.EXACT("Racial differences")) OR (MAINSUBJECT.EXACT("Single persons") OR MAINSUBJECT.EXACT("Single fathers") OR MAINSUBJECT.EXACT("Single parents") OR MAINSUBJECT.EXACT("Single parent family") OR MAINSUBJECT.EXACT("Adolescent mothers") OR MAINSUBJECT.EXACT("Adolescent parents") OR MAINSUBJECT.EXACT("Adolescent fathers") OR MAINSUBJECT.EXACT("Same sex marriage") OR MAINSUBJECT.EXACT("Single mothers") OR MAINSUBJECT.EXACT("Marital status")) OR MAINSUBJECT.EXACT("Rural urban differences") OR MAINSUBJECT.EXACT("Gender inequality")) OR (MAINSUBJECT.EXACT("Cultural differences") OR title((famil* OR parent* OR mothe* OR fathe* OR carer* OR caregiver* OR "care giver*") NEAR/2 (income* OR economic* OR wealth* OR race* OR racial* OR "marital stat*" OR single* OR "mental health*" OR health* OR illness* OR diseas* OR condition* OR psychiatr* OR psycholog* OR disabl* OR disabilit* OR educat* OR school* OR nation* OR languag*)) OR if((famil* OR parent* OR mothe* OR fathe* OR carer* OR caregiver* OR "care giver*") NEAR/2 (income* OR economic* OR wealth* OR race* OR racial* OR "marital stat*" OR single* OR "mental health*" OR health* OR illness* OR diseas* OR condition* OR psychiatr* OR psycholog* OR disabl* OR disabilit* OR educat* OR school* OR nation* OR languag*)) OR abstract(urban* OR rural*) OR title(urban* OR rural*) OR if(urban* OR rural*) OR MAINSUBJECT.EXACT("Cultural differences") OR MAINSUBJECT.EXACT("Multilingualism"))) AND (abstract(child* OR Adolescent* OR "young person" OR "young people" OR youth* OR infant* OR toddler* OR "pre-school" OR preschool OR paediatric* OR pediatric* OR baby OR babies OR neonat* OR "neo nat*" OR teen* OR CYP) OR title(child* OR Adolescent* OR "young person" OR "young people" OR youth* OR infant* OR toddler* OR "pre-school" OR preschool OR paediatric* OR pediatric* OR baby OR babies OR neonat* OR "neo nat*" OR teen* OR CYP) OR if(child* OR Adolescent* OR "young person" OR "young people" OR youth* OR infant* OR toddler* OR "pre-school" OR preschool OR paediatric* OR pediatric* OR baby OR babies OR neonat* OR "neo nat*" OR teen* OR CYP) OR (MAINSUBJECT.EXACT("Pediatrics") OR MAINSUBJECT.EXACT.EXPLODE("Children") OR MAINSUBJECT.EXACT("Infants") OR MAINSUBJECT.EXACT("Adolescents") OR MAINSUBJECT.EXACT("Foster children") OR MAINSUBJECT.EXACT("Toddlers") OR MAINSUBJECT.EXACT("Preschool children"))) AND (abstract(("long term" OR chronic) NEAR/2 (condition* OR illness* OR disorder* OR disease*)) OR title(("long term" OR chronic) NEAR/2 (condition* OR illness* OR disorder* OR disease*)) OR if(("long term" OR chronic) NEAR/2 (condition* OR illness* OR disorder* OR disease*)) OR (MAINSUBJECT.EXACT("Chronic illnesses") OR MAINSUBJECT.EXACT("Long term health care")))

Results: 625

Set#: S2

Searched for: abstract((access* or interfac* or seek* or obtain*) NEAR/1 (health* or doctor* or nurs* or professional* or medic* or physiotherap* or occupational or "speech-and-language*" or emergenc* or paediatric* or pediatric*)) OR title((access* or interfac* or seek* or obtain*) NEAR/1 (health* or doctor* or nurs* or professional* or medic* or physiotherap* or occupational or "speech-and-language*" or emergenc* or paediatric* or pediatric*)) OR if((access* or interfac* or seek* or obtain*) NEAR/1 (health* or doctor* or nurs* or professional* or medic* or physiotherap* or occupational or "speech-and-language*" or emergenc* or paediatric* or pediatric*)) OR (MAINSUBJECT.EXACT("Health care access") OR MAINSUBJECT.EXACT("Health care delivery") OR MAINSUBJECT.EXACT("Mental health services") OR MAINSUBJECT.EXACT("Health services")) OR abstract(diagnos* NEAR/1 (journ* or process* or test* or imag* or scan* or procedur*)) OR title(diagnos* NEAR/1 (journ* or process* or test* or imag* or scan* or procedur*)) OR if(diagnos* NEAR/1 (journ* or process* or test* or imag* or scan* or procedur*)) OR abstract((communicat* or Inform* or discuss* or break* or explain* or explanation*) NEAR/4 (diagnos* or condition* or illness* or disorder* or disease*)) OR title((communicat* or Inform* or discuss* or break* or explain* or explanation*) NEAR/4 (diagnos* or condition* or illness* or disorder* or disease*)) OR if((communicat* or Inform* or discuss* or break* or explain* or explanation*) NEAR/4 (diagnos* or condition* or illness* or disorder* or disease*))

Results: 36436

Set#: S3

Searched for: (MAINSUBJECT.EXACT("Medical treatment") OR MAINSUBJECT.EXACT("Treatment compliance") OR MAINSUBJECT.EXACT("Disease control") OR MAINSUBJECT.EXACT("Medical decision making") OR MAINSUBJECT.EXACT("Prescription drugs") OR MAINSUBJECT.EXACT("Treatment methods") OR MAINSUBJECT.EXACT("Termination of treatment") OR MAINSUBJECT.EXACT("Medical diagnosis") OR MAINSUBJECT.EXACT("Treatment outcomes") OR MAINSUBJECT.EXACT("Therapy") OR MAINSUBJECT.EXACT.EXPLODE("Rehabilitation") OR MAINSUBJECT.EXACT("Psychotherapy") OR MAINSUBJECT.EXACT("Occupational therapy") OR MAINSUBJECT.EXACT("Counseling")) OR abstract(treat* or manag* or therap* or drug* or medicin* or chemo* or cytotoxic* or radiotherap* or surger* or "surgical manag*") OR title(treat* or manag* or therap* or drug* or medicin* or chemo* or cytotoxic* or radiotherap* or surger* or "surgical manag*") OR if(treat* or manag* or therap* or drug* or medicin* or chemo* or cytotoxic* or radiotherap* or surger* or "surgical manag*") OR abstract((transition* or transfer* or progress* or shift*) NEAR/2 adult*) OR title((transition* or transfer* or progress* or shift*) NEAR/2 adult*) OR if((transition* or transfer* or progress* or shift*) NEAR/2 adult*)

Results: 243891

Set#: S4

Searched for: abstract(hospital* or hospice* or ((primary or secondary or tertiary or quaternary or mental or psychiatric) NEAR/0 (care* or "health care*" or healthcare*)) or NHS or "national health service*" or school* or college* or community) OR title(hospital* or hospice* or ((primary or secondary or tertiary or quaternary or mental or psychiatric) NEAR/0 (care* or "health care*" or healthcare*)) or NHS or "national health service*" or school* or college* or community) OR if(hospital* or hospice* or ((primary or secondary or tertiary or quaternary or mental or psychiatric) NEAR/0 (care* or "health care*" or healthcare*)) or NHS or "national health service*" or school* or college* or community) OR (MAINSUBJECT.EXACT("Primary care") OR MAINSUBJECT.EXACT("Hospitals") OR MAINSUBJECT.EXACT("Community mental health services") OR MAINSUBJECT.EXACT("Home health care") OR MAINSUBJECT.EXACT("Community health services") OR MAINSUBJECT.EXACT("Hospice care") OR MAINSUBJECT.EXACT("Psychiatric hospitals")) OR abstract(hous* or home* or "social support*" or "financial aid*" or "government aid*" or equipment*) OR title(hous* or home* or "social support*" or "financial aid*" or "government aid*" or equipment*) OR if(hous* or home* or "social support*" or "financial aid*" or "government aid*" or equipment*) OR (MAINSUBJECT.EXACT("Social support") OR MAINSUBJECT.EXACT("Social welfare") OR MAINSUBJECT.EXACT("Social work"))

Results: 471066

Set#: S5

Searched for: abstract(guid* or polic* or legislat*) OR title(guid* or polic* or legislat*) OR if(guid* or polic* or legislat*) OR (MAINSUBJECT.EXACT("Legislation") OR MAINSUBJECT.EXACT("Mental health policy") OR MAINSUBJECT.EXACT("Statutes") OR MAINSUBJECT.EXACT("Public policy") OR MAINSUBJECT.EXACT("Health care policy") OR MAINSUBJECT.EXACT("Health planning")) OR abstract("educational access*" or (school NEAR/0 (exclusion* or access* or attendance*)) or "missed school*") OR title("educational access*" or (school NEAR/0 (exclusion* or access* or attendance*)) or "missed school*") OR if("educational access*" or (school NEAR/0 (exclusion* or access* or attendance*)) or "missed school*") OR MAINSUBJECT.EXACT("Absenteeism")

Results: 303070

Set#: S6

Searched for: [S2] OR [S3] OR [S4] OR [S5]

Results: 828804

Set#: S7

Searched for: [S1] AND [S6]

Results: 453

Set#: S8

Searched for: ([S1] AND [S6]) AND pd(20100101-20241231)

Results: 317

Set#: S9

Searched for: ([S1] AND [S6]) AND (la.exact("ENG") AND pd(20100101-20241231))

Results: 310

# **APA PsycInfo <1806 to February Week 5 2024>**

ProQuest

(Conducted 01/03/2024)

1     (Health adj (inequalit* or disadvantage* or equit* or inequit* or equalit* or disparit*)).ab,id,ot,ti.      17176

2     health disparities/     11833

3     social status/ or exp income level/ or exp poverty/ or economic inequality/ or exp socioeconomic status/ or social class/ or lower income level/ or middle income level/ or upper income level/ or economic inequality/ or social equality/     86505

4     health education/ or exp health literacy/ or health promotion/ or educational background/ or parent educational background/ or exp digital literacy/ or information literacy/ or literacy/ or number comprehension/ or comprehension/ or learning disabilities/   110153

5     exp "race and ethnic discrimination"/ or social discrimination/ or exp minority groups/ or "racial and ethnic differences"/ or exp racism/ or systemic racism/    75361

6     same sex marriage/ or single parents/ or single fathers/ or single mothers/ or marital status/ or adolescent mothers/ or adolescent fathers/    11029

7     rural health/ or urban health/ or regional differences/     5364

8     gender equality/  2376

9     communication barriers/ or digital divide/      2054

10    ((famil* or parent* or mothe* or fathe* or carer* or caregiver* or care giver*) adj3 (income* or economic* or wealth* or race* or racial* or marital stat* or single* or mental health* or health* or illness* or diseas* or condition* or psychiatr* or psycholog* or disabl* or disabilit* or educat* or school* or nation* or languag*)).ab,id,ot,ti.    152788

11    (urban* or rural*).ab,id,ot,ti.     113573

12    sociocultural factors/ or ethnic identity/ or racial identity/    67361

13    english as second language/ or language proficiency/  14593

14    1 or 2 or 3 or 4 or 5 or 6 or 7 or 8 or 9 or 10 or 11 or 12 or 13 561302

15    (child* or Adolescent* or young person or young people or youth* or infant* or toddler* or pre-school or preschool or paediatric* or pediatric* or baby or babies or neonat* or neo nat* or teen* or CYP).ab,id,ot,ti.  1113867

16    pediatrics/ or chronically ill children/ or early adolescence/ or late adolescence/ or neonatal period/ or postnatal period/ or preschool students/ or childhood development/ or child health/ or adolescent health/    144245

17    15 or 16    1120246

18    ((long term or chronic) adj3 (condition* or illness* or disorder* or disease*)).ab,id,ot,ti.    59322

19    chronic illness/ or chronic mental illness/ or "chronicity (disorders)"/ or long term care/     27171

20    18 or 19    72196

21    14 and 17 and 20  3742

22    ((access* or interfac* or seek* or obtain*) adj2 (health* or doctor* or nurs* or professional* or medic* or physiotherap* or occupational or "speech-and-language*" or emergenc* or paediatric* or pediatric*)).ab,id,ot,ti.  29045

23    health care access/ or health care delivery/ or health care services/   71792

24    (diagnos* adj2 (journ* or process* or test* or imag* or scan* or procedur*)).ab,id,ot,ti. 13395

25    ((communicat* or Inform* or discuss* or break* or explain* or explanation*) adj5 (diagnos* or condition* or illness* or disorder* or disease*)).ab,id,ot,ti.      69511

26    diagnosis/ or differential diagnosis/ or dual diagnosis/ or patient history/ or medical diagnosis/ or biopsy/ or prenatal diagnosis/ or patient history/ or physical examination/ or misdiagnosis/ or teleconsultation/ or symptom checklists/  85730

27    (treat* or manag* or therap* or drug* or medicin* or chemo* or cytotoxic* or radiotherap* or surger* or surgical manag*).ab,id,ot,ti.     1528857

28    ((transition* or transfer* or progress* or shift*) adj3 adult*).ab,id,ot,ti.  7534

29    treatment/ or exp drug therapy/ or chemotherapy/ or radiation therapy/ or exp behavior therapy/ or exp counseling/ or exp psychotherapy/ or physical therapy/ or exercise therapy/ or habilitation/ or exp intervention/ or exp outpatient treatment/ or exp psychotherapy/ or exp rehabilitation/ or exp therapeutic processes/ or exp treatment outcomes/ or video-based interventions/ or exp "prescribing (drugs)"/ or treatment compliance/ or treatment termination/ or treatment withholding/ or treatment barriers/ or treatment duration/ or early intervention/ or caregiving/ or disease management/ or telemedicine/ or online therapy/ or telepsychiatry/ or telerehabilitation/   926233

30    (hospital* or hospice* or ((primary or secondary or tertiary or quaternary or mental or psychiatric) adj (care* or health care* or healthcare*)) or NHS or national health service* or school* or college* or community).ab,id,ot,ti.     1144904

31    primary health care/ or general practitioners/ or family medicine/ or community services/ or home care/ or community mental health/ or community mental health centers/ or community psychiatry/ or exp community mental health services/ 67368

32    hospice/ or hospitals/ or mental health services/ or psychiatric clinics/ or psychiatric units/ or psychiatric hospitals/ or hospital environment/    75312

33    (hous* or home* or social support* or financial aid* or government aid* or equipment*).ab,id,ot,ti.   332980

34    child welfare/ or social support/   55733

35    (guid* or polic* or legislat*).ab,id,ot,ti.     517952

36    health care policy/ or government policy making/ or legislative processes/ or legal processes/ or exp laws/ 71295

37    (educational access* or (school adj (exclusion* or access* or attendance*)) or missed school*).ab,id,ot,ti. 3104

38    school attendance/      2748

39    22 or 23 or 24 or 25 or 26 or 27 or 28 or 29 or 30 or 31 or 32 or 33 or 34 or 35 or 36 or 37 or 38    3029060

40    21 and 39   3011

41    limit 40 to (english language and yr="2010")    94

**CINAHL Search**

(Conducted 04/03/2024)

Interface - EBSCOhost Research Databases
Search Screen - Advanced Search
Database – CINAHL

Run 4/3/24

| **#** | **Query** | **Results** |
| --- | --- | --- |
| S1 | TI ( Health N0 (inequalit* or disadvantage* or equit* or inequit* or equalit* or disparit*) ) OR AB ( Health N0 (inequalit* or disadvantage* or equit* or inequit* or equalit* or disparit*) ) OR TI ( (famil* or parent* or mothe* or fathe* or carer* or caregiver* or "care giver*") N2 (income* or economic* or wealth* or race* or racial* or "marital stat*" or single* or "mental health*" or health* or illness* or diseas* or condition* or psychiatr* or psycholog* or disabl* or disabilit* or educat* or school* or nation* or languag*) ) OR AB ( (famil* or parent* or mothe* or fathe* or carer* or caregiver* or "care giver*") N2 (income* or economic* or wealth* or race* or racial* or "marital stat*" or single* or "mental health*" or health* or illness* or diseas* or condition* or psychiatr* or psycholog* or disabl* or disabilit* or educat* or school* or nation* or languag*) ) OR TI ( urban* or rural* ) OR AB ( urban* or rural* ) | 226,461 |
| S2 | (MH "Healthcare Disparities") OR (MH "Socioeconomic Disparities in Health") OR (MH "Health Status Disparities") OR (MH "Health Inequities") OR (MH "Social Determinants of Health") OR (MH "Rural Health") OR (MH "Urban Health") | 50,328 |
| S3 | (MH "Social Status") OR (MH "Low Socioeconomic Status") OR (MH "Social Class") OR (MH "Gender Equality") OR (MH "Racial Equality") OR (MH "Ethnic Groups") OR (MH "Diversity, Equity, Inclusion") OR (MH "Children of Impaired Parents") OR (MH "Same-Sex Marriage") OR (MH "Single Parent") OR (MH "Marital Status") OR (MH "Adolescent Parents") OR (MH "Adolescent Mothers") OR (MH "Adolescent Fathers") OR (MH "Minority Groups") OR (MH "Linguistic Minorities") OR (MH "Poverty+") OR (MH "Social Factors") OR (MH "Socioeconomic Factors+") OR (MH "Housing Instability") OR (MH "Illiteracy") OR (MH "Literacy") OR (MH "Economic Status") OR (MH "Sociodemographic Factors") OR (MH "Cultural Deprivation") OR (MH "Cultural Diversity") OR (MH "Racism+") OR (MH "Systemic Racism") OR (MH "Sexism") OR (MH "Social Group") OR (MH "Income") | 476,623 |
| S4 | (MH "Race Factors") OR (MH "Sex Factors") | 160,300 |
| S5 | (MH "Health Education") | 31,536 |
| S6 | (MH "Health Literacy") OR (MH "Information Literacy") OR (MH "Computer Literacy") | 13,863 |
| S7 | (MH "Health Promotion") | 80,060 |
| S8 | (MH "Educational Status") | 48,439 |
| S9 | (MH "Digital Divide") | 520 |
| S10 | (MH "Access to Information") OR (MH "Communication Barriers") OR (MH "Limited English Proficiency") OR (MH "English as a Second Language") | 34,991 |
| S11 | S1 OR S2 OR S3 OR S4 OR S5 OR S6 OR S7 OR S8 OR S9 OR S10 | 887,483 |
| S12 | TI ( child* or Adolescent* or "young person" or "young people" or youth* or infant* or toddler* or "pre-school" or preschool or paediatric* or pediatric* or baby or babies or neonat* or "neo nat*" or teen* or CYP ) OR AB ( child* or Adolescent* or "young person" or "young people" or youth* or infant* or toddler* or "pre-school" or preschool or paediatric* or pediatric* or baby or babies or neonat* or "neo nat*" or teen* or CYP ) | 950,265 |
| S13 | (MH "Child") OR (MH "Children with Disabilities") OR (MH "Child, Hospitalized") OR (MH "Children of Impaired Parents") OR (MH "Child, Institutionalized") OR (MH "Child, Preschool") OR (MH "Infant+") OR (MH "Infant, Newborn+") OR (MH "Adolescence") OR (MH "Adolescent, Hospitalized") | 1,122,719 |
| S14 | (MH "Pediatrics") OR (MH "Neonatology") OR (MH "Perinatology") | 23,139 |
| S15 | S12 OR S13 OR S14 | 1,431,700 |
| S16 | TI ( ("long term" or chronic) N2 (condition* or illness* or disorder* or disease*) ) OR AB ( ("long term" or chronic) N2 (condition* or illness* or disorder* or disease*) ) | 135,131 |
| S17 | (MH "Chronic Disease") | 73,098 |
| S18 | (MH "Long Term Care") | 28,134 |
| S19 | S16 OR S17 OR S18 | 208,236 |
| S20 | S11 AND S15 AND S19 | 9,011 |
| S21 | TI ( (access* or interfac* or seek* or obtain*) N1 (health* or doctor* or nurs* or professional* or medic* or physiotherap* or occupational or "speech-and-language*" or emergenc* or paediatric* or pediatric*) ) OR AB ( (access* or interfac* or seek* or obtain*) N1 (health* or doctor* or nurs* or professional* or medic* or physiotherap* or occupational or "speech-and-language*" or emergenc* or paediatric* or pediatric*) ) | 45,364 |
| S22 | (MH "Health Services Accessibility") OR (MH "Right to Health") OR (MH "Access to Primary Care") OR (MH "Health Care Delivery") | 168,527 |
| S23 | TI ( diagnos* N1 (journ* or process* or test* or imag* or scan* or procedur*) ) OR AB ( diagnos* N1 (journ* or process* or test* or imag* or scan* or procedur*) ) | 34,997 |
| S24 | TI ( (communicat* or Inform* or discuss* or break* or explain* or explanation*) N4 (diagnos* or condition* or illness* or disorder* or disease*) ) OR AB ( (communicat* or Inform* or discuss* or break* or explain* or explanation*) N4 (diagnos* or condition* or illness* or disorder* or disease*) ) | 50,643 |
| S25 | (MH "Diagnosis") OR (MH "Prenatal Diagnosis") OR (MH "Early Diagnosis") OR (MH "Diagnosis, Differential") OR (MH "Diagnosis, Dual (Psychiatry)") OR (MH "Diagnosis, Delayed") OR (MH "Diagnostic Imaging") OR (MH "Physical Examination") OR (MH "Diagnosis, Laboratory+") OR (MH "Cytodiagnosis") OR (MH "Electrodiagnosis+") OR (MH "Patient History Taking") OR (MH "Patient Assessment") | 561,553 |
| S26 | (MH "Diagnostic Errors") OR (MH "Failure to Diagnose") | 14,306 |
| S27 | (MH "Remote Consultation") | 3,314 |
| S28 | TI ( treat* or manag* or therap* or drug* or medicin* or chemo* or cytotoxic* or radiotherap* or surger* or "surgical manag*" ) OR AB ( treat* or manag* or therap* or drug* or medicin* or chemo* or cytotoxic* or radiotherap* or surger* or "surgical manag*" ) | 2,465,765 |
| S29 | TI ( (transition* or transfer* or progress* or shift*) N2 adult* ) OR AB ( (transition* or transfer* or progress* or shift*) N2 adult* ) | 4,581 |
| S30 | (MH "Treatment Duration") OR (MH "Treatment Withdrawal") OR (MH "Treatment Outcomes") OR (MH "Treatment Errors") OR (MH "Treatment Failure") OR (MH "Treatment Termination") OR (MH "Treatment Delay") OR (MH "Conservative Treatment") OR (MH "Treatment Switching") OR (MH "Early Intervention") OR (MH "Therapeutics") OR (MH "Diet Therapy") OR (MH "Drug Therapy+") OR (MH "Chemotherapy, Cancer") OR (MH "Habilitation") OR (MH "Occupational Therapy") OR (MH "Physical Therapy") OR (MH "Pediatric Occupational Therapy") OR (MH "Pediatric Physical Therapy") OR (MH "Patient Care") OR (MH "Rehabilitation+") OR (MH "Radiotherapy+") OR (MH "Telerehabilitation") OR (MH "Repeat Procedures") OR (MH "Rehabilitation, Pediatric") | 997,849 |
| S31 | (MH "Psychotherapy+") | 233,747 |
| S32 | (MH "Counseling") OR (MH "Mental Health Counseling") OR (MH "Mental Health Teletherapy") | 34,648 |
| S33 | (MH "Telemedicine") | 16,803 |
| S34 | (MH "Physical Medicine") | 2,003 |
| S35 | (MH "Antibiotic Prophylaxis") | 6,472 |
| S36 | (MH "Treatment Errors+") | 28,114 |
| S37 | (MH "Disease Management") | 25,424 |
| S38 | (MH "Medication Compliance") OR (MH "Patient Compliance") | 58,388 |
| S39 | TI ( hospital* or hospice* or ((primary or secondary or tertiary or quaternary or mental or psychiatric) N0 (care* or "health care*" or healthcare*)) or NHS or "national health service*" or school* or college* or community ) OR AB ( hospital* or hospice* or ((primary or secondary or tertiary or quaternary or mental or psychiatric) N0 (care* or "health care*" or healthcare*)) or NHS or "national health service*" or school* or college* or community ) | 1,133,031 |
| S40 | (MH "Primary Health Care") OR (MH "Tertiary Health Care") OR (MH "Secondary Health Care") | 86,986 |
| S41 | (MH "Family Practice") | 26,467 |
| S42 | (MH "Community Mental Health Services+") OR (MH "Hospitals, Community") OR (MH "Community Medicine") OR (MH "Community Health Nursing+") OR (MH "Hospitals, Public") OR (MH "Hospitals, Special") OR (MH "Hospices") OR (MH "Hospitals, Pediatric") OR (MH "Hospitals, Psychiatric") OR (MH "Hospitals") | 148,240 |
| S43 | (MH "Mental Health Services") OR (MH "Child Health Services") | 46,005 |
| S44 | (MH "Support, Psychosocial") | 99,366 |
| S45 | TI ( hous* or home* or "social support*" or "financial aid*" or "government aid*" or equipment* ) OR AB ( hous* or home* or "social support*" or "financial aid*" or "government aid*" or equipment* ) | 339,605 |
| S46 | (MH "Social Work") | 14,767 |
| S47 | TI ( guid* or polic* or legislat* ) OR AB ( guid* or polic* or legislat* ) | 565,557 |
| S48 | (MH "Public Policy") OR (MH "Health Policy") OR (MH "Legislation") OR (MH "Legislation, Medical") | 102,759 |
| S49 | (MH "Health and Welfare Planning") | 11,939 |
| S50 | TI ( "educational access*" or (school N0 (exclusion* or access* or attendance*)) or "missed school*" ) OR AB ( "educational access*" or (school N0 (exclusion* or access* or attendance*)) or "missed school*" ) | 1,391 |
| S51 | (MH "School Re-Entry") | 1,017 |
| S52 | S21 OR S22 OR S23 OR S24 OR S25 OR S26 OR S27 OR S28 OR S29 OR S30 OR S31 OR S32 OR S33 OR S34 OR S35 OR S36 OR S37 OR S38 OR S39 OR S40 OR S41 OR S42 OR S43 OR S44 OR S45 OR S46 OR S47 OR S48 OR S49 OR S50 OR S51 | 4,476,525 |
| S53 | S20 AND S52 | 7,146 |
| S54 | S20 AND S52  Limiters - Publication Date: 20100101-20241231 | 5,359 |
| S55 | S20 AND S52  Limiters - Publication Date: 20100101-20241231 Narrow by Language: - english | 5,130 |

Bottom of Form
